# Supplementary material for: Adsorption and Purification of Baicalin from Scutellaria baicalensis Georgi Extract by Ionic Liquids (ILs) Grafted Silica
Source: MDPI journal article supplement (doi:10.3390/molecules26082322), 2021-04-16
Supplement: s1 [file s1]

Supplementary Materials

# Adsorption and Purification of Baicalin from *Scutellaria Baicalensis* Georgi Extract by Ionic Liquids (ILs) Grafted Silica

Yunchang Fan<sup>1,\*</sup>, Di Wu<sup>1</sup> and Sheli Zhang<sup>2</sup>

<sup>1</sup> College of Chemistry and Chemical Engineering, Henan Polytechnic University, Jiaozuo 454003, China

<sup>2</sup> College of Science and Technology, Jiaozuo Teachers College, Jiaozuo, 454000, China

\* Correspondence: yunchangfan2009@163.com; Tel.: +863913986813, Fax: +863913987815.

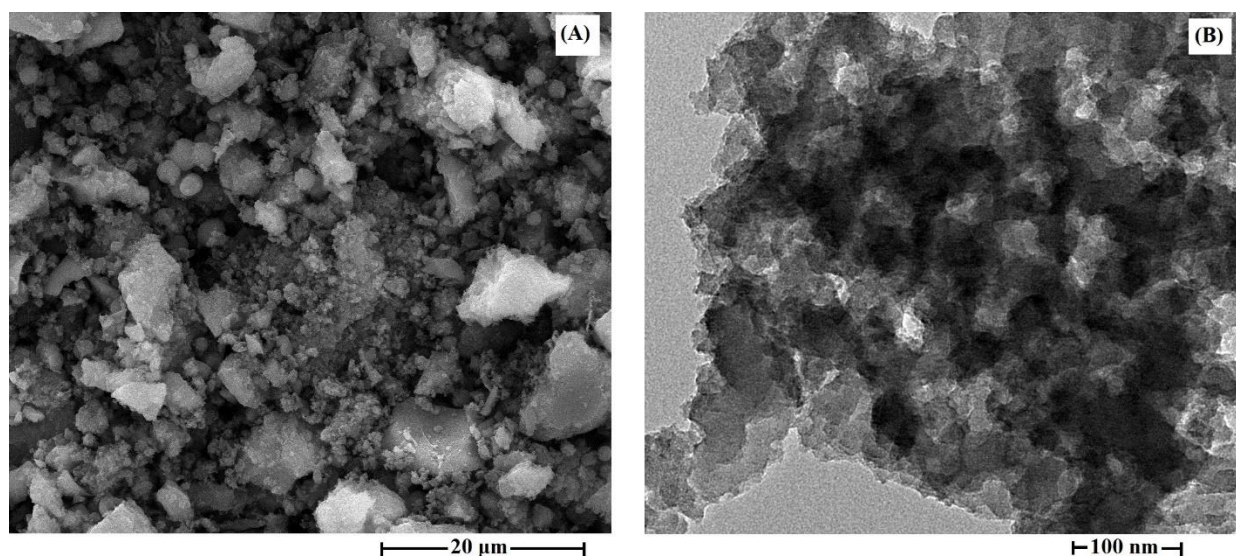

Figure S1. The FE-SEM (A) and TEM (B) images of  $[\text{C}_3\text{C}_2\text{OHim}]^+\text{Cl}^-@\text{SiO}_2$ .

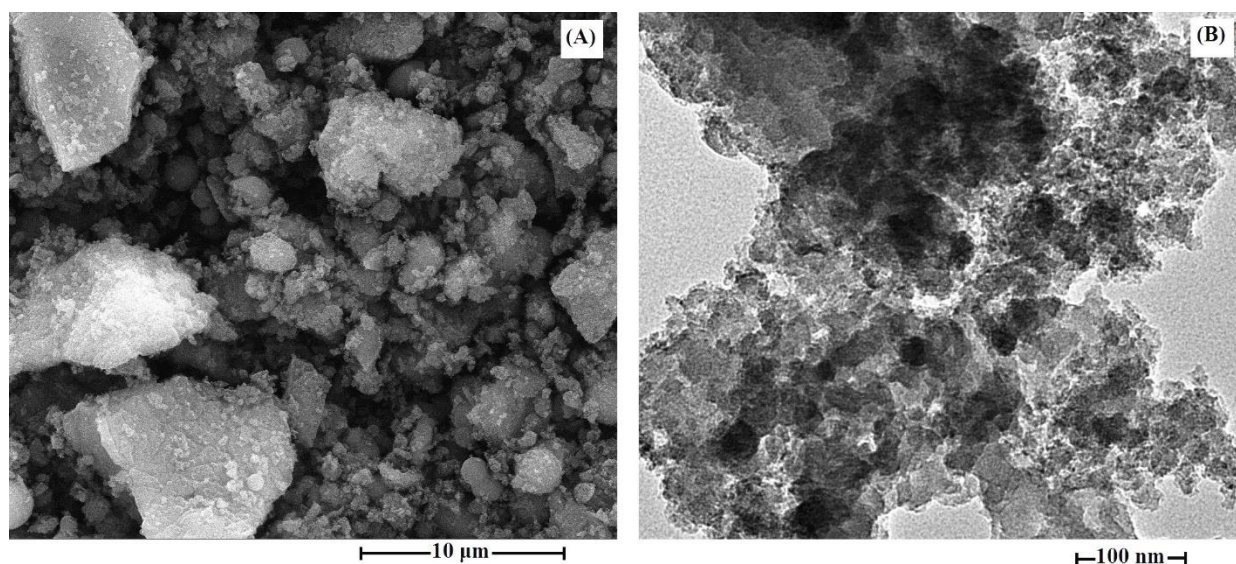

Figure S2. The FE-SEM (A) and TEM (B) images of  $[\text{C}_3\text{Bzim}]^+\text{Cl}^-@\text{SiO}_2$ .

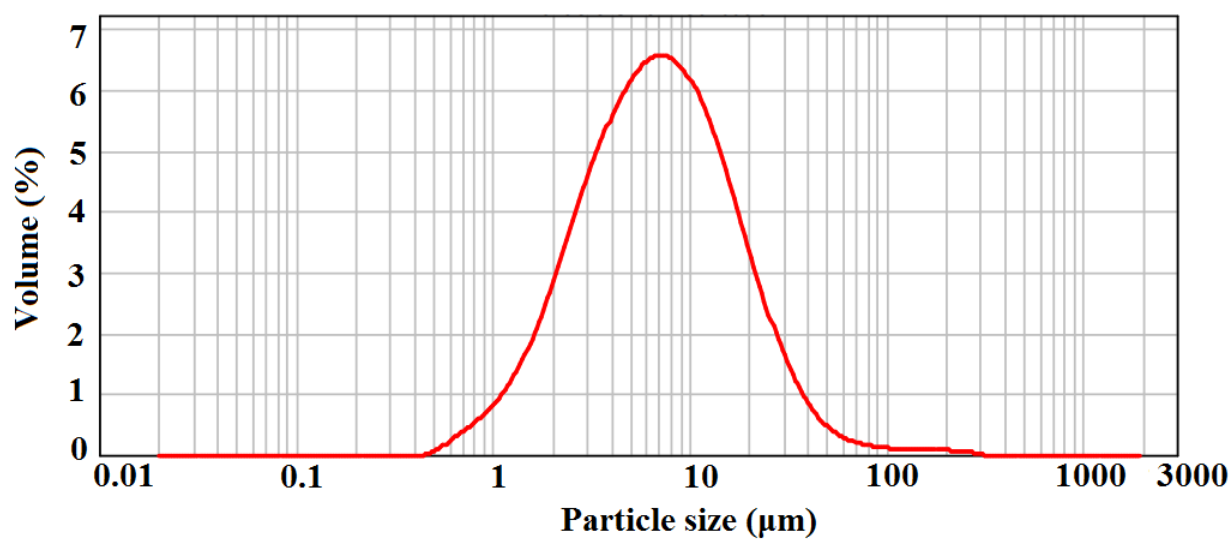

Figure S3. Particle size distribution of  $[\text{C}_3\text{C}_2\text{OHim}]^+\text{Cl}^-@\text{SiO}_2$ .

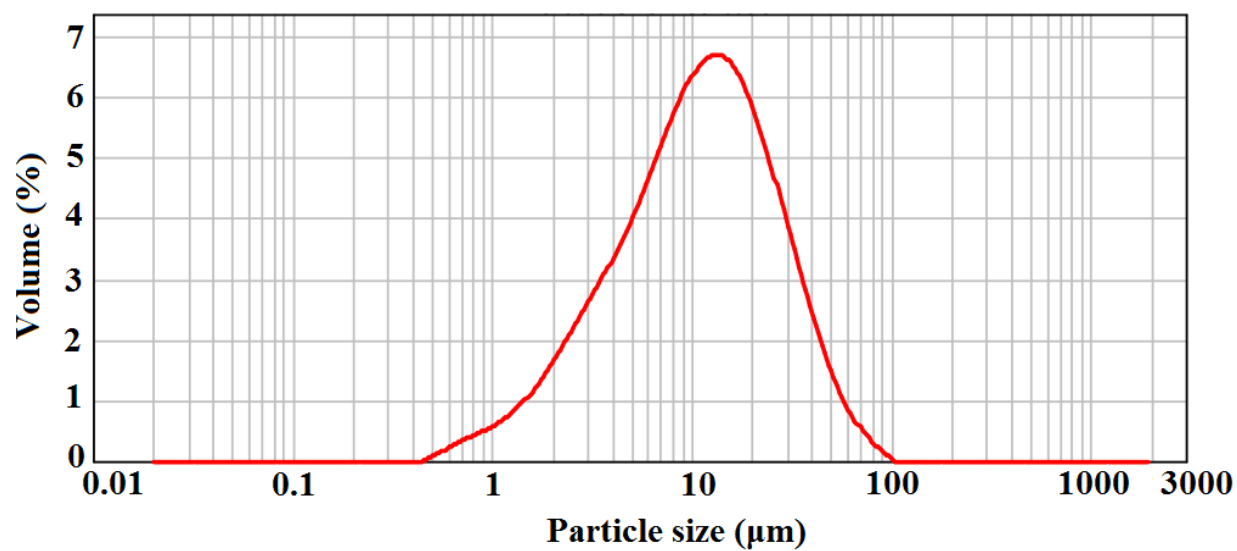

Figure S4. Particle size distribution of  $[\text{C}_3\text{Bzim}]^+\text{Cl}^-@\text{SiO}_2$ .
